# Supplementary material
Source: Research Square preprint supplement (doi:10.21203/rs.3.rs-9642664/v1)
Supplement: Supplementary file 1 [file 797fb12903a303e58ab42db4.xlsx]

## Sheet: Supplementary table S1
Supplementary table S1. HPV type-specific point prevalence for each of the study visits at the ages of 18, 22, 25 and 28 years old stratified by age at vaccination and vaccination trial arm (A=gender-neutral vaccination, B=Only-girls vaccination, C=No vaccination at 12-to-15 years old).
18 Years old visit
	A				B				C		All arms
	Vaccination 12 to 15 years old		Vaccination 18 years old		Vaccination 12 to 15 years old		Vaccination 18 years old		Vaccination 18 years old		Vaccination 12 to 15 years old		Vaccination 18 years old
HPV type	n (N=1849)	Prevalence (CI 95%)	n (N=91)	Prevalence (CI 95%)	n (N=1751)	Prevalence (CI 95%)	n (N=104)	Prevalence (CI 95%)	n (N=860)	Prevalence (CI 95%)	n (N=3600)	Prevalence (CI 95%)	n (N=1055)	Prevalence (CI 95%)
HPV 16	8	0.43 ( 0.19 - 0.85 )	7	7.69 ( 3.15 - 15.21 )	7	0.4 ( 0.16 - 0.82 )	6	5.77 ( 2.15 - 12.13 )	65	7.56 ( 5.88 - 9.53 )	15	0.42 (0.21 - 0.63)	78	7.39 (5.81 - 8.97)
HPV 18	4	0.22 ( 0.06 - 0.55 )	4	4.4 ( 1.21 - 10.87 )	3	0.17 ( 0.04 - 0.5 )	4	3.85 ( 1.06 - 9.56 )	39	4.53 ( 3.24 - 6.15 )	7	0.19 (0.05 - 0.34)	47	4.45 (3.21 - 5.70)
HPV 31	13	0.7 ( 0.37 - 1.2 )	5	5.49 ( 1.81 - 12.36 )	7	0.4 ( 0.16 - 0.82 )	7	6.73 ( 2.75 - 13.38 )	24	2.79 ( 1.8 - 4.12 )	20	0.56 (0.31 - 0.80)	36	3.41 (2.32 - 4.51)
HPV 45	9	0.49 ( 0.22 - 0.92 )	4	4.4 ( 1.21 - 10.87 )	5	0.29 ( 0.09 - 0.67 )	3	2.88 ( 0.6 - 8.2 )	22	2.56 ( 1.61 - 3.85 )	14	0.39 (0.19 - 0.59)	29	2.75 (1.76 - 3.74)
HPV 51	128	6.92 ( 5.81 - 8.18 )	11	12.09 ( 6.19 - 20.6 )	117	6.68 ( 5.56 - 7.95 )	7	6.73 ( 2.75 - 13.38 )	48	5.58 ( 4.14 - 7.33 )	245	6.80 (5.98 - 7.63)	66	6.26 (1.76 - 3.74)
HPV 16/18	12	0.65 (0.28 - 1.02)	11	12.09 (5.39 - 18.79)	10	0.57 (0.22 - 0.92)	10	9.62 (3.95 - 15.28)	104	12.09 (9.91 - 14.27)	22	0.61 (0.36 - 0.87)	125	11.85 (9.90 - 13.80)
HPV 31/45	22	1.19 (0.70 - 1.68)	9	9.89 (3.76 - 16.02)	12	0.69 (0.30 - 1.07)	10	9.62 (3.95 - 15.28)	46	5.35 (3.85 - 6.85)	34	0.94 (0.63 - 1.26)	65	6.16 (4.71 -7.61)
22 Years old visit
	A				B				C		All arms
	Vaccination 12 to 15 years old		Vaccination 18 years old		Vaccination 12 to 15 years old		Vaccination 18 years old		Vaccination 18 years old		Vaccination 12 to 15 years old		Vaccination 18 years old
HPV type	n (N=2418)	Prevalence (CI 95%)	n (N=119)	Prevalence (CI 95%)	n (N=2297)	Prevalence (CI 95%)	n (N=119)	prev	n (N=1026)	prev	n (N=4715)	prev	n (N=1264)	Prevalence (CI 95%)
HPV 16	8	0.33 ( 0.14 - 0.65 )	3	2.52 ( 0.52 - 7.19 )	3	0.13 ( 0.03 - 0.38 )	2	1.68 ( 0.2 - 5.94 )	24	2.34 ( 1.5 - 3.46 )	11	0.23 ( 0.1 - 0.37 )	29	2.29 ( 1.47 - 3.12 )
HPV 18	4	0.17 ( 0.05 - 0.42 )	0	0 ( 0 - 3.05 )	1	0.04 ( 0 - 0.24 )	1	0.84 ( 0.02 - 4.59 )	7	0.68 ( 0.27 - 1.4 )	5	0.11 ( 0.01 - 0.2 )	8	0.63 ( 0.2 - 1.07 )
HPV 31	13	0.54 ( 0.29 - 0.92 )	7	5.88 ( 2.4 - 11.74 )	17	0.74 ( 0.43 - 1.18 )	2	1.68 ( 0.2 - 5.94 )	17	1.66 ( 0.97 - 2.64 )	30	0.64 ( 0.41 - 0.86 )	26	2.06 ( 1.27 - 2.84 )
HPV 45	15	0.62 ( 0.35 - 1.02 )	1	0.84 ( 0.02 - 4.59 )	12	0.52 ( 0.27 - 0.91 )	2	1.68 ( 0.2 - 5.94 )	12	1.17 ( 0.61 - 2.03 )	27	0.57 ( 0.36 - 0.79 )	15	1.19 ( 0.59 - 1.78 )
HPV 51	176	7.28 ( 6.27 - 8.39 )	9	7.56 ( 3.52 - 13.87 )	178	7.75 ( 6.69 - 8.92 )	7	5.88 ( 2.4 - 11.74 )	73	7.12 ( 5.62 - 8.86 )	354	7.51 ( 6.76 - 8.26 )	89	7.04 ( 5.63 - 8.45 )
HPV 16/18	12	0.50 (0.22 - 0.78)	3	2.52 (-0.30 - 5.34)	4	0.17 (0.00 - 0.34)	3	2.54 (-0.30 - 5.38)	31	3.02 (1.97 - 4.07)	16	0.34 (0.17 - 0.51)	37	2.93 (2.00 - 3.86)
HPV 31/45	28	1.16 (0.73 -1.59)	8	6.72 (2.22 - 11.22)	29	1.26 (0.81 - 1.72)	4	3.36 (0.12 - 6.66)	29	2.83 (1.81 - 3.84)	57	1.21 (0.90 - 1.52)	41	3.24 (2.27 - 4.22)
25 Years old visit
	A				B				C		All arms
	Vaccination 12 to 15 years old		Vaccination 18 years old		Vaccination 12 to 15 years old		Vaccination 18 years old		Vaccination 18 years old		Vaccination 12 to 15 years old		Vaccination 18 years old
HPV type	n (N=2564)	Prevalence (CI 95%)	n (N=118)	Prevalence (CI 95%)	n (N=2483)	Prevalence (CI 95%)	n (N=114)	Prevalence (CI 95%)	n (N=976)	Prevalence (CI 95%)	n (N=5047)	Prevalence (CI 95%)	n (N=1208)	Prevalence (CI 95%)
HPV 16	7	0.27 ( 0.11 - 0.56 )	2	1.69 ( 0.21 - 5.99 )	6	0.24 ( 0.09 - 0.53 )	2	1.75 ( 0.21 - 6.19 )	13	1.33 ( 0.71 - 2.27 )	13	0.26 ( 0.12 - 0.4 )	17	1.41 ( 0.74 - 2.07 )
HPV 18	1	0.04 ( 0 - 0.22 )	0	0 ( 0 - 3.08 )	3	0.12 ( 0.02 - 0.35 )	0	0 ( 0 - 3.18 )	2	0.2 ( 0.02 - 0.74 )	4	0.08 ( 0 - 0.16 )	2	0.17 ( -0.06 - 0.39 )
HPV 31	10	0.39 ( 0.19 - 0.72 )	5	4.24 ( 1.39 - 9.61 )	9	0.36 ( 0.17 - 0.69 )	1	0.88 ( 0.02 - 4.79 )	12	1.23 ( 0.64 - 2.14 )	19	0.38 ( 0.21 - 0.55 )	18	1.49 ( 0.81 - 2.17 )
HPV 45	9	0.35 ( 0.16 - 0.67 )	0	0 ( 0 - 3.08 )	2	0.08 ( 0.01 - 0.29 )	0	0 ( 0 - 3.18 )	3	0.31 ( 0.06 - 0.9 )	11	0.22 ( 0.09 - 0.35 )	3	0.25 ( -0.03 - 0.53 )
HPV 51	87	3.43 ( 2.76 - 4.21 )	1	0.85 ( 0.02 - 4.63 )	78	3.14 ( 2.49 - 3.91 )	4	3.51 ( 0.96 - 8.74 )	37	3.79 ( 2.68 - 5.19 )	166	3.29 ( 2.8 - 3.78 )	42	3.48 ( 2.44 - 4.51 )
HPV 16/18	8	0.31 (0.10 - 0.53)	2	1.69 (-0.63 - 4.02)	9	0.36 (0.13 - 0.60)	2	1.75 (-0.66 - 4.16)	15	1.54 (0.77 - 2.31)	17	0.34 (0.18 - 0.50)	19	1.58 (0.87 - 2.28)
HPV 31/45	19	0.74 (0.41 - 1.07)	5	4.24 (0.60 - 7.87)	11	0.44 (0.18 - 0.70)	1	0.88 (-0.83 - 2.59)	15	1.54 (0.77 - 2.31)	30	0.60 (0.38 - 0.81)	21	1.75 (1.01 - 2.49)
28 Years old visit
	A		B		All arms
	Vaccination 12 to 15 years old		Vaccination 12 to 15 years old		Vaccination 12 to 15 years old
HPV type	n (N=2395)	Prevalence (CI 95%)	n (N=2357)	Prevalence (CI 95%)	n (N=4752)	Prevalence (CI 95%)
HPV 16	5	0.21 (0.07 - 0.49)	8	0.34 (0.15 - 0.67)	13	0.27 (0.13 - 0.42)
HPV 18	1	0.04 (0 - 0.23)	0	0 (0 - 0.16)	1	0.02 (-0.02 - 0.06)
HPV 31	5	0.21 (0.07-0.49)	5	0.21 (0.07 - 0.49)	10	0.21 (0.08 - 0.34)
HPV 45	7	0.29 (0.12 - 0.60)	3	0.13 (0.03 - 0.37)	10	0.21 (0.08 - 0.34)
HPV 51	53	2.22 (1.66 - 2.88)	46	1.95 (1.43 - 2.59)	99	2.08 (1.68 - 2.49)
HPV 16/18	6	0.25 (-0.03 - 0.53)	8	0.34 (0.01 - 0.67)	14	0.29 (0.14 - 0.45)
HPV 31/45	12	0.50 (0.10 - 0.90)	8	0.34 (0.01 - 0.67)	20	0.42 (0.24 - 0.60)

## Sheet: Supplementary table S2
Supplementary table S2. HPV type-specific incident cases and incidence rates per 100 women-years between study visits (between ages of 18 and 22 years old, 22 and 25 years old, 25 and 28 years old) stratified by age at vaccination and vaccination trial arm (A=gender-neutral vaccination, B=Only-girls vaccination, C=No vaccination at 12-to-15 years old).
Between visits 18 to 22
	A						B						C			All arms
	Vaccination 12 to 15 years old			Vaccination 18 years old			Vaccination 12 to 15 years old			Vaccination 18 years old			Vaccination 18 years old			Vaccination 12 to 15 years old			Vaccination 18 years old
HPV type	Incident cases (n)	Person-time (years)	Incidence rate (per 100 women-years, CI 95%)	Incident cases (n)	Person-time (years)	Incidence rate (per 100 women-years, CI 95%)	Incident cases (n)	Person-time (years)	Incidence rate (per 100 women-years, CI 95%)	Incident cases (n)	Person-time (years)	Incidence rate (per 100 women-years, CI 95%)	Incident cases (n)	Person-time (years)	Incidence rate (per 100 women-years, CI 95%)	Incident cases (n)	Person-time (years)	Incidence rate (per 100 women-years, CI 95%)	Incident cases (n)	Person-time (years)	Incidence rate (per 100 women-years, CI 95%)
HPV 16	5	4956.44	0.1 ( 0.03 - 0.24 )	1	256.66	0.39 ( 0.01 - 2.17 )	2	4763.26	0.04 ( 0.01 - 0.15 )	1	315.03	0.32 ( 0.01 - 1.77 )	5	2522.12	0.2 ( 0.06 - 0.46 )	7	9719.699	0.07 ( 0.03 - 0.15 )	7	3093.799	0.23 ( 0.09 - 0.47 )
HPV 18	3	4963.99	0.06 ( 0.01 - 0.18 )	0	273.31	0 ( 0 - 1.35 )	1	4762.29	0.02 ( 0 - 0.12 )	0	326.98	0 ( 0 - 1.13 )	5	2600.67	0.19 ( 0.06 - 0.45 )	4	9726.272	0.04 ( 0.01 - 0.11 )	5	3200.958	0.16 ( 0.05 - 0.36 )
HPV 31	7	4945.76	0.14 ( 0.06 - 0.29 )	4	265.80	1.5 ( 0.41 - 3.85 )	9	4750.80	0.19 ( 0.09 - 0.36 )	1	312.77	0.32 ( 0.01 - 1.78 )	8	2661.23	0.3 ( 0.13 - 0.59 )	16	9696.553	0.17 ( 0.09 - 0.27 )	13	3239.803	0.40 ( 0.21 - 0.69 )
HPV 45	7	4953.76	0.14 ( 0.06 - 0.29 )	1	269.18	0.37 ( 0.01 - 2.07 )	9	4754.34	0.19 ( 0.09 - 0.36 )	1	326.21	0.31 ( 0.01 - 1.71 )	7	2669.37	0.26 ( 0.11 - 0.54 )	16	9708.093	0.16 ( 0.09 - 0.27 )	9	3264.764	0.28 ( 0.13 - 0.52 )
HPV 51	109	4602.09	2.37 ( 1.94 - 2.86 )	3	242.95	1.23 ( 0.25 - 3.61 )	103	4400.82	2.34 ( 1.91 - 2.84 )	6	316.33	1.9 ( 0.7 - 4.13 )	60	2574.14	2.33 ( 1.78 - 3 )	212	9002.910	2.35 ( 2.05 - 2.69 )	69	3133.421	2.20 ( 1.71 - 2.79 )
HPV 16/18	8	4978.81	0.16 (0.07 - 0.32)	1	283.77	0.35 (0.01 - 1.96)	3	4773.18	0.06 (0.01 - 0.18)	1	334.35	0.30 (0.01 - 1.67)	10	2702.93	0.37 (0.18 - 0.68)	11	9751.99	0.11 (0.06 - 0.20)	12	3321.05	0.36 (0.19 - 0.63)
HPV 31/45	14	4978.81	0.28 (0.15 - 0.48)	5	283.77	1.76 (0.57 - 4.11)	18	4773.18	0.38 (0.22 - 0.60)	2	337.69	0.59 (0.07 - 2.14)	15	2731.51	0.55 (0.31 - 0.91)	32	9751.99	0.33 (0.22 - 0.46)	22	3352.97	0.66 (0.41 - 0.99)
Between visits 22 to 25
	A						B						C			All arms
	Vaccination 12 to 15 years old			Vaccination 18 years old			Vaccination 12 to 15 years old			Vaccination 18 years old			Vaccination 18 years old			Vaccination 12 to 15 years old			Vaccination 18 years old
HPV type	Incident cases (n)	Person-time (years)	Incidence rate (per 100 women-years, CI 95%)	Incident cases (n)	Person-time (years)	Incidence rate (per 100 women-years, CI 95%)	Incident cases (n)	Person-time (years)	Incidence rate (per 100 women-years, CI 95%)	Incident cases (n)	Person-time (years)	Incidence rate (per 100 women-years, CI 95%)	Incident cases (n)	Person-time (years)	Incidence rate (per 100 women-years, CI 95%)	Incident cases (n)	Person-time (years)	Incidence rate (per 100 women-years, CI 95%)	Incident cases (n)	Person-time (years)	Incidence rate (per 100 women-years, CI 95%)
HPV 16	3	5969.70	0.05 ( 0.01 - 0.15 )	0	299.21	0 ( 0 - 1.23 )	6	5820.01	0.1 ( 0.04 - 0.22 )	1	291.97	0.34 ( 0.01 - 1.91 )	3	2537.22	0.12 ( 0.02 - 0.35 )	9	11789.711	0.08 ( 0.03 - 0.14 )	4	3128.402	0.13 ( 0.03 - 0.33 )
HPV 18	0	5976.87	0 ( 0 - 0.06 )	0	307.20	0 ( 0 - 1.2 )	3	5826.50	0.05 ( 0.01 - 0.15 )	0	297.22	0 ( 0 - 1.24 )	1	2578.99	0.04 ( 0 - 0.22 )	3	11803.373	0.03 ( 0.01 - 0.07 )	1	3183.414	0.03 ( 0 - 0.18 )
HPV 31	3	5955.94	0.05 ( 0.01 - 0.15 )	0	285.41	0 ( 0 - 1.29 )	4	5789.85	0.07 ( 0.02 - 0.18 )	0	294.41	0 ( 0 - 1.25 )	8	2548.02	0.31 ( 0.14 - 0.62 )	7	11745.785	0.06 ( 0.02 - 0.12 )	8	3127.841	0.26 ( 0.11 - 0.5 )
HPV 45	5	5953.49	0.08 ( 0.03 - 0.2 )	0	304.99	0 ( 0 - 1.21 )	1	5800.08	0.02 ( 0 - 0.1 )	0	294.71	0 ( 0 - 1.25 )	3	2561.14	0.12 ( 0.02 - 0.34 )	6	11753.577	0.05 ( 0.02 - 0.11 )	3	3160.841	0.09 ( 0.02 - 0.28 )
HPV 51	59	5549.93	1.06 ( 0.81 - 1.37 )	1	282.81	0.35 ( 0.01 - 1.97 )	46	5379.19	0.86 ( 0.63 - 1.14 )	2	280.48	0.71 ( 0.09 - 2.58 )	27	2410.89	1.12 ( 0.74 - 1.63 )	105	10929.123	0.96 ( 0.79 - 1.16 )	30	2974.185	1.01 ( 0.68 - 1.44 )
HPV 16/18	3	6020.11	0.05 (0.01 - 0.15)	0	307.2	0 (0 - 1.20)	8	5842.21	0.14 (0.06 - 0.27)	1	297.22	0.34 (0.01 - 1.90)	4	2604.80	0.15 (0.04 - 0.40)	11	11862.31	0.09 (0.05 - 0.17)	5	3209.22	0.16 (0.05 - 0.37)
HPV 31/45	8	6020.11	0.13 (0.06 - 0.26)	0	307.2	0 (0 - 1.20)	5	5842.21	0.09 (0.03 - 0.20)	0	297.22	0 (0 - 1.26)	11	2589.22	0.42 (0.21 - 0.76)	13	11823.02	0.11 (0.06 - 0.19)	11	3193.65	0.34 (0.17 - 0.62)
Between visits 25-28
	A			B			All arms
	Vaccination 12 to 15 years old			Vaccination 12 to 15 years old			Vaccination 12 to 15 years old
HPV type	Incident cases (n)	Person-time (years)	Incidence rate (per 100 women-years, CI 95%)	Incident cases (n)	Person-time (years)	Incidence rate (per 100 women-years, CI 95%)	Incident cases (n)	Person-time (years)	Incidence rate (per 100 women-years, CI 95%)
HPV 16	4	6960.69	0.06 ( 0.02 - 0.15 )	8	6915.43	0.12 ( 0.05 - 0.23 )	12	13876.115	0.09 ( 0.04 - 0.15 )
HPV 18	1	6975.66	0.01 ( 0 - 0.08 )	0	6923.72	0 ( 0 - 0.05 )	1	13899.387	0.01 ( 0 - 0.04 )
HPV 31	2	6951.83	0.03 ( 0 - 0.1 )	1	6901.14	0.01 ( 0 - 0.08 )	3	13852.977	0.02 ( 0 - 0.06 )
HPV 45	4	6949.18	0.06 ( 0.02 - 0.15 )	3	6925.32	0.04 ( 0.01 - 0.13 )	7	13874.505	0.05 ( 0.02 - 0.1 )
HPV 51	40	6733.22	0.59 ( 0.42 - 0.81 )	29	6703.73	0.43 ( 0.29 - 0.62 )	69	13436.958	0.51 ( 0.4 - 0.65 )
HPV 16/18	5	6421.09	0.08 (0.03 - 0.18)	8	6339.97	0.13 (0.05 - 0.25)	13	12761.07	0.10 (0.05 - 0.17)
HPV 31/45	5	7034.20	0.07 (0.02 - 0.17)	4	7051.21	0.06 (0.02 - 0.15)	9	14085.41	0.06 (0.03 - 0.12)

## Sheet: Supplementary table S3
S3. HPV-type specific Incidence Rate Ratio (IRR) with respective 95% confidence interval of vaccination at the age of 18 years old and vaccination at the age of 12 to 15 years old. IRR was calculated for all arms and adjusted by arm effect (Adjusted IRR)
All visits
Vaccination 18 / Vaccination 12 to 15 (reference)
	A	B	all arms	all arms
HPV type	IRR (CI, 95%)	IRR (CI, 95%)	IRR (CI, 95%)	Adjusted IRR (CI, 95%)
HPV 16	4.73 ( 1.06 - 21.11 )	5.48 ( 1.18 - 25.38 )	2.47 ( 1.16 - 5.24 )	5.07 ( 1.74 - 14.76 )
HPV 18	0 ( 0 - Inf )	0 ( 0 - Inf )	3.34 ( 0.94 - 11.85 )	0 ( 0 - Inf )
HPV 31	12.75 ( 4.43 - 36.7 )	2.06 ( 0.27 - 15.82 )	4.76 ( 2.65 - 8.54 )	6.90 ( 2.81 - 16.96 )
HPV 45	1.7 ( 0.23 - 12.8 )	3.19 ( 0.73 - 13.94 )	2.23 ( 1.19 - 4.19 )	2.46 ( 0.75 - 8.05 )
HPV 51	0.91 ( 0.4 - 2.05 )	0.99 ( 0.46 - 2.11 )	1.31 ( 1.04 - 1.64 )	0.95 ( 0.55 - 1.65 )

## Sheet: Supplementary table S4
S4. HPV type specific prevalence for unvaccinated participants at the age of 18. Participants not vaccinated with HPV16/18 were either vaccinated with HBV vaccine or none.
	A
	HBV-vaccinated		Unvaccinated		All no HPV-vaccination
HPV type	n (N=339)	Prevalence (CI 95%)	n (N=584)	Prevalence (CI 95%)	n (N=923)	Prevalence (CI 95%)
HPV16	27	7.96 (5.08 - 10.85)	39	6.68 (4.65 - 8.70)	66	7.15 (5.49 - 8.81)
HPV18	16	4.72 (2.46 - 6.98)	27	4.62 (2.92 - 6.33)	43	4.66 (3.30 - 6.02)
HPV31	15	4.42 (2.24 - 6.61)	17	2.91 (1.55 - 4.27)	32	3.47 (2.29 - 4.65)
HPV45	13	3.83 (1.79 - 5.88)	14	2.40 (1.16 - 3.64)	27	2.93 (1.84 - 4.01)
HPV51	33	9.73 (6.58 - 12.89)	45	7.71 (5.54 - 9.87)	78	8.45 (6.66 - 10.25)
HPV16/18	43	12.68 (9.14 - 16.23)	66	11.30 (8.73 - 13.87)	109	11.81 (9.73 - 13.89)
HPV31/45	28	8.26 (5.33 - 11.19)	31	5.31 (3.49 - 7.13)	59	6.39 (4.81 - 7.97)
	B
	HBV-vaccinated		Unvaccinated		All no HPV-vaccination
HPV type	n (N=384)	Prevalence (CI 95%)	n (N=682)	Prevalence (CI 95%)	n (N=1066)	Prevalence (CI 95%)
HPV16	24	6.25 (3.83 - 8.67)	49	7.18 (5.25 - 9.12)	73	6.85 (5.33 - 8.36)
HPV18	8	2.08 (0.66 - 3.51)	33	4.84 (3.23 - 6.45)	41	3.85 (2.69 - 5.00)
HPV31	16	4.17 (2.17 - 6.17)	21	3.08 (1.78 - 4.38)	37	3.47 (2.37 - 4.57)
HPV45	11	2.86 (1.20 - 4.53)	11	1.61 (0.67 - 2.56)	22	2.06 (1.21 - 2.92)
HPV51	27	7.03 (4.47 - 9.59)	50	7.33 (5.38 - 9.29)	77	7.22 (5.67 - 8.78)
HPV16/18	32	8.33 (5.57 - 11.10)	82	12.02 (9.58 - 14.46)	114	10.69 (8.84 - 12.55)
HPV31/45	27	7.03 (4.47 - 9.59)	32	4.69 (3.11 - 6.28)	59	5.53 (4.16 - 6.91)
	C
	HBV-vaccinated		Unvaccinated		All no HPV-vaccination
HPV type	n (N=2805)	Prevalence (CI 95%)	n = 570	Prevalence (CI 95%)	n (N=3375)	Prevalence (CI 95%)
HPV16	197	7.02 (6.08 - 7.97)	49	8.60 (6.30 - 10.90)	246	7.29 (6.41 - 8.17)
HPV18	111	3.96 (3.24 - 4.68)	33	5.79 (3.87 - 7.71)	144	4.27 (3.59 - 4.95)
HPV31	96	3.42 (2.75 - 4.10)	23	4.04 (2.42 - 5.65)	119	3.53 (2.90 - 4.15)
HPV45	56	2.00 (1.48 - 2.51)	16	2.81 (1.45 - 4.16)	72	2.13 (1.65 - 2.62)
HPV51	170	6.06 (5.18 - 6.94)	40	7.02 (4.92 - 9.12)	210	6.22 (5.41 - 7.04)
HPV16/18	308	10.98 (9.82 - 12.14)	82	14.39 (11.51 - 17.27)	390	11.56 (10.48 - 12.63)
HPV31/45	152	5.42 (4.58 - 6.26)	39	6.84 (4.77 - 8.92)	191	5.66 (4.88 - 6.44)
	all arms
	HBV-vaccinated		Unvaccinated		All no HPV-vaccination
HPV type	n (N=3528)	Prevalence (CI 95%)	n (N=1836)	Prevalence (CI 95%)	n (N=5364)	Prevalence (CI 95%)
HPV16	248	7.03 (6.19 - 7.87)	137	7.46 (6.26 - 8.66)	385	7.18 (6.49 - 7.87)
HPV18	135	3.83 (3.19 - 4.46)	93	5.07 (4.06 - 6.07)	228	4.25 (3.71 - 4.79)
HPV31	127	3.60 (2.99 - 4.21)	61	3.32 (2.50 - 4.14)	188	3.50 (3.01 - 4.00)
HPV45	80	2.27 (1.78 - 2.76)	41	2.23 (1.56 - 2.91)	121	2.26 (1.86 - 2.65)
HPV51	230	6.52 (5.71 - 7.33)	135	7.35 (6.16 - 8.55)	365	6.80 (6.13 - 7.48)
HPV16/18	383	10.86 (9.83 - 11.88)	230	12.53 (11.01 - 14.04)	613	11.43 (10.58 - 12.28)
HPV31/45	207	5.87 (5.09 - 6.64)	102	5.56 (4.51 - 6.60)	309	5.76 (5.14 - 6.38)

## Sheet: Supplementary table S5
S5. Type-specific clearance proportion between different study visits (between ages of 18 and 22 years old, 22 and 25 years old, 25 and 28 years old) stratified by age at vaccination. Where n is the cleared HPV-type specific infections and N the total of HPV-type specific infections at baseline.
Cleared infection cases between visits at 18 and 22 years old
	All arms
	12-to-15-years-old vaccination		18-years-old vaccination
HPV type	n (N)	Clearance proprotion (95% CI)	n (N)	Clearance proprotion (95% CI)
HPV16	9 ( 10 )	90 ( 55.5 - 99.75 )	59 ( 76 )	77.63 ( 66.62 - 86.4 )
HPV18	7 ( 7 )	100 ( 59.04 - 100 )	44 ( 46 )	95.65 ( 85.16 - 99.47 )
HPV 31	15 ( 17 )	88.24 ( 63.56 - 98.54 )	31 ( 36 )	86.11 ( 70.5 - 95.33 )
HPV 45	11 ( 13 )	84.62 ( 54.55 - 98.08 )	27 ( 29 )	93.1 ( 77.23 - 99.15 )
HPV 51	200 ( 218 )	91.74 ( 87.26 - 95.03 )	61 ( 64 )	95.31 ( 86.91 - 99.02 )
HPV 16/18	16 ( 17 )	94.12 ( 71.31 - 99.85 )	95 ( 111 )	85.59 ( 77.65 - 91.53 )
HPV 31/45	26 ( 30 )	86.67 ( 69.28 - 96.24 )	57 ( 62 )	91.94 ( 82.17 - 97.33 )
Cleared infection cases between visits at 22 and 25 years old
	All arms
	12-to-15-years-old vaccination		18-years-old vaccination
HPV type	n (N)	Clearance proprotion (95% CI)	n (N)	Clearance proprotion (95% CI)
HPV16	9 ( 10 )	90 ( 55.5 - 99.75 )	12 ( 25 )	48 ( 27.8 - 68.69 )
HPV18	5 ( 5 )	100 ( 47.82 - 100 )	4 ( 5 )	80 ( 28.36 - 99.49 )
HPV 31	19 ( 26 )	73.08 ( 52.21 - 88.43 )	14 ( 23 )	60.87 ( 38.54 - 80.29 )
HPV 45	22 ( 24 )	91.67 ( 73 - 98.97 )	13 ( 13 )	100 ( 75.29 - 100 )
HPV 51	277 ( 312 )	88.78 ( 84.74 - 92.06 )	68 ( 79 )	86.08 ( 76.45 - 92.84 )
HPV 16/18	14 ( 15 )	93.33 ( 68.05 - 99.83 )	16 ( 30 )	53.33 ( 34.33 - 71.66 )
HPV 31/45	41 ( 50 )	82 ( 68.56 - 91.42 )	27 ( 36 )	75 ( 57.8 - 87.88 )
Cleared infection cases between visits at 25 and 28 years old
	All arms
	12-to-15-years-old vaccination
HPV type	n (N)	Clearance proprotion (95% CI)
HPV16	10 ( 11 )	90.91 ( 58.72 - 99.77 )
HPV18	3 ( 3 )	100 ( 29.24 - 100 )
HPV 31	11 ( 18 )	61.11 ( 35.75 - 82.7 )
HPV 45	8 ( 11 )	72.73 ( 39.03 - 93.98 )
HPV 51	131 ( 156 )	83.97 ( 77.26 - 89.35 )
HPV 16/18	12 ( 13 )	92.31 ( 63.97 - 99.81 )
HPV 31/45	19 ( 29 )	65.52 ( 45.67 - 82.06 )

## Sheet: Supplementary table S6
S6. Prevalence ratio (PR) and Ratio of prevalence ratios (RPR) and vaccine effectiveness (VE) by arm and age of vaccination for each vaccine-covered HPV type. HPV51 is used as reference type as a non-vaccine covered HPV type.
		HPV-vaccinated at 12 to 15 years old
		A				B
HPV type	Visit at age	Prevalence (%)	PR (CI, 95%)	RPR (CI, 95%)	VE (CI, 95%)	Prevalence (%)	PR (CI, 95%)	RPR (CI, 95%)	VE (CI, 95%)
HPV16	18*	6.47 ( 4.78 - 8.54 )	ref			6.8 ( 5.16 - 8.76 )	ref
	22	0.28 ( 0.12 - 0.55 )	0.05 ( 0.02 - 0.14 )	0.07 ( 0.03 - 0.19 )	0.93 ( 0.81 - 0.97 )	0.11 ( 0.02 - 0.32 )	0.02 ( 0.01 - 0.09 )	0.02 ( 0.01 - 0.05 )	0.98 ( 0.95 - 0.99 )
	25	0.24 ( 0.1 - 0.5 )	0.04 ( 0.02 - 0.12 )	0.11 ( 0.05 - 0.28 )	0.89 ( 0.72 - 0.95 )	0.22 ( 0.08 - 0.47 )	0.05 ( 0.02 - 0.14 )	0.1 ( 0.03 - 0.37 )	0.9 ( 0.63 - 0.97 )
	28	0.17 ( 0.06 - 0.41 )	0.03 ( 0.01 - 0.1 )	0.14 ( 0.05 - 0.45 )	0.86 ( 0.55 - 0.95 )	0.29 ( 0.13 - 0.57 )	0.06 ( 0.02 - 0.17 )	0.20 ( 0.07 - 0.6 )	0.8 ( 0.42 - 0.93 )
HPV18	18*	4.36 ( 2.98 - 6.13 )	ref			4.57 ( 3.24 - 6.25 )	ref
	22	0.14 ( 0.04 - 0.36 )	0.04 ( 0.01 - 0.17 )	0.06 ( 0.01 - 0.24 )	0.94 ( 0.76 - 0.99 )	0.04 ( 0 - 0.2 )	0.01 ( 0 - 0.1 )	0.01 ( 0 - Inf )	0.99 ( -Inf - 1 )
	25	0.03 ( 0 - 0.19 )	0.01 ( 0 - 0.1 )	0.03 ( 0 - Inf )	0.97 ( -Inf - 1 )	0.11 ( 0.02 - 0.32 )	0.03 ( 0.01 - 0.15 )	0.06 ( 0.02 - 0.23 )	0.94 ( 0.77 - 0.98 )
	28	0.03 ( 0 - 0.19 )	0.01 ( 0 - 0.1 )	0.05 ( 0 - Inf )	0.95 ( -Inf - 1 )	0 ( 0 - 0.13 )	0 ( 0 - Inf )	-	-
HPV31	18*	3.09 ( 1.95 - 4.65 )	ref			3.46 ( 2.31 - 4.96 )	ref
	22	0.45 ( 0.24 - 0.77 )	0.12 ( 0.04 - 0.32 )	0.17 ( 0.06 - 0.48 )	0.83 ( 0.52 - 0.94 )	0.62 ( 0.36 - 0.99 )	0.11 ( 0.05 - 0.26 )	0.09 ( 0.04 - 0.22 )	0.91 ( 0.78 - 0.96 )
	25	0.35 ( 0.17 - 0.64 )	0.09 ( 0.03 - 0.26 )	0.26 ( 0.09 - 0.76 )	0.74 ( 0.24 - 0.91 )	0.33 ( 0.15 - 0.62 )	0.06 ( 0.02 - 0.16 )	0.12 ( 0.04 - 0.33 )	0.88 ( 0.67 - 0.96 )
	28	0.17 ( 0.06 - 0.41 )	0.04 ( 0.01 - 0.15 )	0.19 ( 0.05 - 0.74 )	0.81 ( 0.26 - 0.95 )	0.18 ( 0.06 - 0.42 )	0.03 ( 0.01 - 0.1 )	0.1 ( 0.03 - 0.33 )	0.9 ( 0.67 - 0.97 )
HPV45	18*	2.53 ( 1.51 - 3.97 )	ref			1.73 ( 0.95 - 2.89 )	ref
	22	0.52 ( 0.29 - 0.86 )	0.17 ( 0.06 - 0.49 )	0.24 ( 0.08 - 0.68 )	0.76 ( 0.32 - 0.92 )	0.44 ( 0.23 - 0.76 )	0.18 ( 0.05 - 0.64 )	0.15 ( 0.04 - 0.55 )	0.85 ( 0.45 - 0.96 )
	25	0.31 ( 0.14 - 0.59 )	0.1 ( 0.03 - 0.32 )	0.29 ( 0.09 - 0.93 )	0.71 ( 0.07 - 0.91 )	0.07 ( 0.01 - 0.26 )	0.03 ( 0.01 - 0.18 )	0.06 ( 0.01 - 0.25 )	0.94 ( 0.75 - 0.99 )
	28	0.24 ( 0.1 - 0.5 )	0.08 ( 0.02 - 0.26 )	0.38 ( 0.11 - 1.37 )	0.62 ( -0.37 - 0.89 )	0.11 ( 0.02 - 0.32 )	0.05 ( 0.01 - 0.23 )	0.17 ( 0.03 - 0.81 )	0.83 ( 0.2 - 0.97 )
HPV51	18*	7.88 ( 6 - 10.11 )	ref	ref		7.05 ( 5.38 - 9.03 )	ref	ref
	22	6.13 ( 5.28 - 7.08 )	0.71 ( 0.4 - 1.27 )			6.45 ( 5.57 - 7.44 )	1.17 ( 0.56 - 2.44 )
	25	3.07 ( 2.47 - 3.77 )	0.35 ( 0.19 - 0.65 )			2.83 ( 2.24 - 3.52 )	0.51 ( 0.24 - 1.09 )
	28	1.85 ( 1.39 - 2.41 )	0.21 ( 0.11 - 0.4 )			1.67 ( 1.22 - 2.22 )	0.3 ( 0.14 - 0.66 )
*18 year old visit unvaccinated used as reference for all groups
		HPV-vaccinated at 18 years old
		A				B
HPV type	Visit at age	Prevalence (%)	PR (CI, 95%)	RPR (CI, 95%)	VE (CI, 95%)	Prevalence (%)	PR (CI, 95%)	RPR (CI, 95%)	VE (CI, 95%)
HPV16	18*	6.47 ( 4.78 - 8.54 )	ref			6.8 ( 5.16 - 8.76 )	ref
	22	2.36 ( 0.49 - 6.75 )	0.43 ( 0.11 - 1.62 )	0.52 ( 0.14 - 2.01 )	0.48 ( -1.01 - 0.86 )	1.57 ( 0.19 - 5.57 )	0.33 ( 0.07 - 1.62 )	0.33 ( 0.07 - 1.59 )	0.67 ( -0.59 - 0.93 )
	25	1.57 ( 0.19 - 5.57 )	0.29 ( 0.06 - 1.35 )	3.22 ( 0.68 - 15.28 )	-2.22 ( -14.28 - 0.32 )	1.57 ( 0.19 - 5.57 )	0.33 ( 0.07 - 1.62 )	0.58 ( 0.12 - 2.79 )	0.42 ( -1.79 - 0.88 )
	28
HPV18	18*	4.36 ( 2.98 - 6.13 )	ref			4.57 ( 3.24 - 6.25 )	ref
	22	0 ( 0 - 2.86 )	-	-	-	0.79 ( 0.02 - 4.31 )	0.25 ( 0.03 - 2.21 )	0.25 ( 0.03 - 2.15 )	0.75 ( -1.15 - 0.97 )
	25	0 ( 0 - 2.86 )	-	-	-	0 ( 0 - 2.86 )	-	-	-
	28
HPV31	18*	3.09 ( 1.95 - 4.65 )	ref			3.46 ( 2.31 - 4.96 )	ref
	22	5.51 ( 2.24 - 11.03 )	1.4 ( 0.46 - 4.29 )	1.71 ( 0.56 - 5.21 )	-0.71 ( -4.21 - 0.44 )	1.57 ( 0.19 - 5.57 )	0.29 ( 0.06 - 1.35 )	0.29 ( 0.06 - 1.38 )	0.71 ( -0.38 - 0.94 )
	25	3.94 ( 1.29 - 8.95 )	1 ( 0.3 - 3.37 )	11.11 ( 3.32 - 37.24 )	-10.11 ( -36.24 - -2.32 )	0.79 ( 0.02 - 4.31 )	0.14 ( 0.02 - 1.14 )	0.25 ( 0.03 - 1.85 )	0.75 ( -0.85 - 0.97 )
	28
HPV45	18*	2.53 ( 1.51 - 3.97 )	ref			1.73 ( 0.95 - 2.89 )	ref
	22	0.79 ( 0.02 - 4.31 )	0.25 ( 0.03 - 2.21 )	0.3 ( 0.04 - 2.62 )	0.7 ( -1.62 - 0.96 )	1.57 ( 0.19 - 5.57 )	0.67 ( 0.11 - 3.92 )	0.67 ( 0.11 - 4 )	0.33 ( -3 - 0.89 )
	25	0 ( 0 - 2.86 )	-	-	-	0 ( 0 - 2.86 )	-	-	-
	28
HPV51	18*	7.88 ( 6 - 10.11 )	ref	ref		7.05 ( 5.38 - 9.03 )	ref	ref
	22	7.09 ( 3.29 - 13.03 )	0.82 ( 0.35 - 1.91 )			5.51 ( 2.24 - 11.03 )	1 ( 0.36 - 2.77 )
	25	0.79 ( 0.02 - 4.31 )	0.09 ( 0.01 - 0.69 )			3.15 ( 0.86 - 7.87 )	0.57 ( 0.17 - 1.9 )
	28
		C
HPV type	Visit at age	Prevalence (%)	PR (CI, 95%)	RPR (CI, 95%)	VE (CI, 95%)
HPV16	18*	6.92 ( 5.74 - 8.25 )	ref
	22	2.23 ( 1.43 - 3.29 )	0.37 ( 0.23 - 0.59 )	0.24 ( 0.15 - 0.39 )	0.76 ( 0.61 - 0.85 )
	25	1.21 ( 0.64 - 2.05 )	0.2 ( 0.11 - 0.36 )	0.26 ( 0.14 - 0.47 )	0.74 ( 0.53 - 0.86 )
	28
HPV18	18*	4.37 ( 3.43 - 5.47 )	ref
	22	0.65 ( 0.26 - 1.33 )	0.18 ( 0.08 - 0.4 )	0.12 ( 0.05 - 0.26 )	0.88 ( 0.74 - 0.95 )
	25	0.19 ( 0.02 - 0.67 )	0.05 ( 0.01 - 0.21 )	0.06 ( 0.01 - 0.3 )	0.94 ( 0.7 - 0.99 )
	28
HPV31	18*	2.85 ( 2.1 - 3.77 )	ref
	22	1.58 ( 0.92 - 2.51 )	0.71 ( 0.38 - 1.31 )	0.47 ( 0.25 - 0.87 )	0.53 ( 0.13 - 0.75 )
	25	1.11 ( 0.58 - 1.94 )	0.5 ( 0.25 - 0.99 )	0.65 ( 0.33 - 1.29 )	0.35 ( -0.29 - 0.67 )
	28
HPV45	18*	2.31 ( 1.64 - 3.15 )	ref
	22	1.11 ( 0.58 - 1.94 )	0.55 ( 0.27 - 1.1 )	0.36 ( 0.18 - 0.73 )	0.64 ( 0.27 - 0.82 )
	25	0.28 ( 0.06 - 0.81 )	0.14 ( 0.04 - 0.45 )	0.18 ( 0.05 - 0.61 )	0.82 ( 0.39 - 0.95 )
	28
HPV51	18*	5.34 ( 4.3 - 6.54 )	ref	ref
	22	6.77 ( 5.35 - 8.44 )	1.52 ( 1.07 - 2.17 )
	25	3.43 ( 2.43 - 4.7 )	0.77 ( 0.51 - 1.17 )
	28
		Vaccinated at 12 to 15 years old				Vaccinated at 18 years old
		All arms
HPV type	Visit at age	Prevalence (%)	PR (CI, 95%)	RPR (CI, 95%)	VE (CI, 95%)	Prevalence (%)	PR (CI, 95%)	RPR (CI, 95%)	VE (CI, 95%)
HPV16	18*	6.79 ( 5.94 - 7.72 )	ref			6.79 ( 5.94 - 7.72 )	ref
	22	0.2 ( 0.1 - 0.35 )	0.04 ( 0.02 - 0.08 )	0.04 ( 0.02 - 0.07 )	0.96 ( 0.93 - 0.98 )	2.18 ( 1.46 - 3.11 )	0.37 ( 0.24 - 0.57 )	0.27 ( 0.18 - 0.42 )	0.73 ( 0.58 - 0.82 )
	25	0.23 ( 0.12 - 0.39 )	0.05 ( 0.02 - 0.09 )	0.1 ( 0.05 - 0.21 )	0.9 ( 0.79 - 0.95 )	1.28 ( 0.75 - 2.04 )	0.22 ( 0.13 - 0.37 )	0.34 ( 0.2 - 0.58 )	0.66 ( 0.42 - 0.8 )
	28	0.23 ( 0.12 - 0.39 )	0.05 ( 0.02 - 0.09 )	0.16 ( 0.08 - 0.34 )	0.84 ( 0.66 - 0.92 )
HPV18	18*	4.42 ( 3.73 - 5.19 )	ref			4.42 ( 3.73 - 5.19 )	ref
	22	0.09 ( 0.03 - 0.21 )	0.03 ( 0.01 - 0.08 )	0.03 ( 0.01 - 0.08 )	0.97 ( 0.92 - 0.99 )	0.6 ( 0.26 - 1.18 )	0.17 ( 0.08 - 0.36 )	0.13 ( 0.06 - 0.27 )	0.87 ( 0.73 - 0.94 )
	25	0.07 ( 0.02 - 0.18 )	0.02 ( 0.01 - 0.07 )	0.04 ( 0.01 - 0.1 )	0.96 ( 0.9 - 0.99 )	0.15 ( 0.02 - 0.54 )	0.04 ( 0.01 - 0.17 )	0.06 ( 0.02 - 0.26 )	0.94 ( 0.74 - 0.98 )
	28	0.02 ( 0 - 0.1 )	0.01 ( 0 - 0.04 )	0.03 ( 0 - Inf )	0.97 ( -Inf - 1 )
HPV31	18*	3.06 ( 2.49 - 3.72 )	ref			3.06 ( 2.49 - 3.72 )	ref
	22	0.53 ( 0.36 - 0.76 )	0.19 ( 0.1 - 0.34 )	0.17 ( 0.09 - 0.32 )	0.83 ( 0.68 - 0.91 )	1.95 ( 1.28 - 2.85 )	0.72 ( 0.44 - 1.19 )	0.53 ( 0.32 - 0.88 )	0.47 ( 0.12 - 0.68 )
	25	0.34 ( 0.2 - 0.53 )	0.12 ( 0.06 - 0.23 )	0.24 ( 0.12 - 0.46 )	0.76 ( 0.54 - 0.88 )	1.35 ( 0.8 - 2.13 )	0.5 ( 0.29 - 0.88 )	0.78 ( 0.45 - 1.36 )	0.22 ( -0.36 - 0.55 )
	28	0.18 ( 0.09 - 0.33 )	0.06 ( 0.03 - 0.14 )	0.19 ( 0.09 - 0.42 )	0.81 ( 0.58 - 0.91 )
HPV45	18*	2.21 ( 1.73 - 2.78 )	ref			2.21 ( 1.73 - 2.78 )	ref
	22	0.48 ( 0.32 - 0.7 )	0.24 ( 0.12 - 0.48 )	0.22 ( 0.11 - 0.44 )	0.78 ( 0.56 - 0.89 )	1.13 ( 0.63 - 1.85 )	0.52 ( 0.28 - 0.96 )	0.39 ( 0.21 - 0.71 )	0.61 ( 0.29 - 0.79 )
	25	0.2 ( 0.1 - 0.35 )	0.1 ( 0.04 - 0.22 )	0.2 ( 0.08 - 0.46 )	0.8 ( 0.54 - 0.92 )	0.23 ( 0.05 - 0.66 )	0.1 ( 0.03 - 0.34 )	0.16 ( 0.05 - 0.53 )	0.84 ( 0.47 - 0.95 )
	28	0.18 ( 0.09 - 0.33 )	0.09 ( 0.04 - 0.21 )	0.29 ( 0.13 - 0.67 )	0.71 ( 0.33 - 0.87 )
HPV51	18*	6.34 ( 5.52 - 7.25 )	ref	ref		6.34 ( 5.52 - 7.25 )	ref	ref
	22	6.29 ( 5.67 - 6.96 )	1.09 ( 0.77 - 1.55 )			6.68 ( 5.4 - 8.16 )	1.35 ( 0.99 - 1.84 )
	25	2.95 ( 2.52 - 3.43 )	0.51 ( 0.35 - 0.74 )			3.15 ( 2.28 - 4.24 )	0.64 ( 0.44 - 0.93 )
	28	1.76 ( 1.43 - 2.14 )	0.31 ( 0.21 - 0.45 )
*18 year old visit unvaccinated used as reference for all groups
