# Supplementary material
Source: Research Square preprint supplement (doi:10.21203/rs.3.rs-9642664/v1)

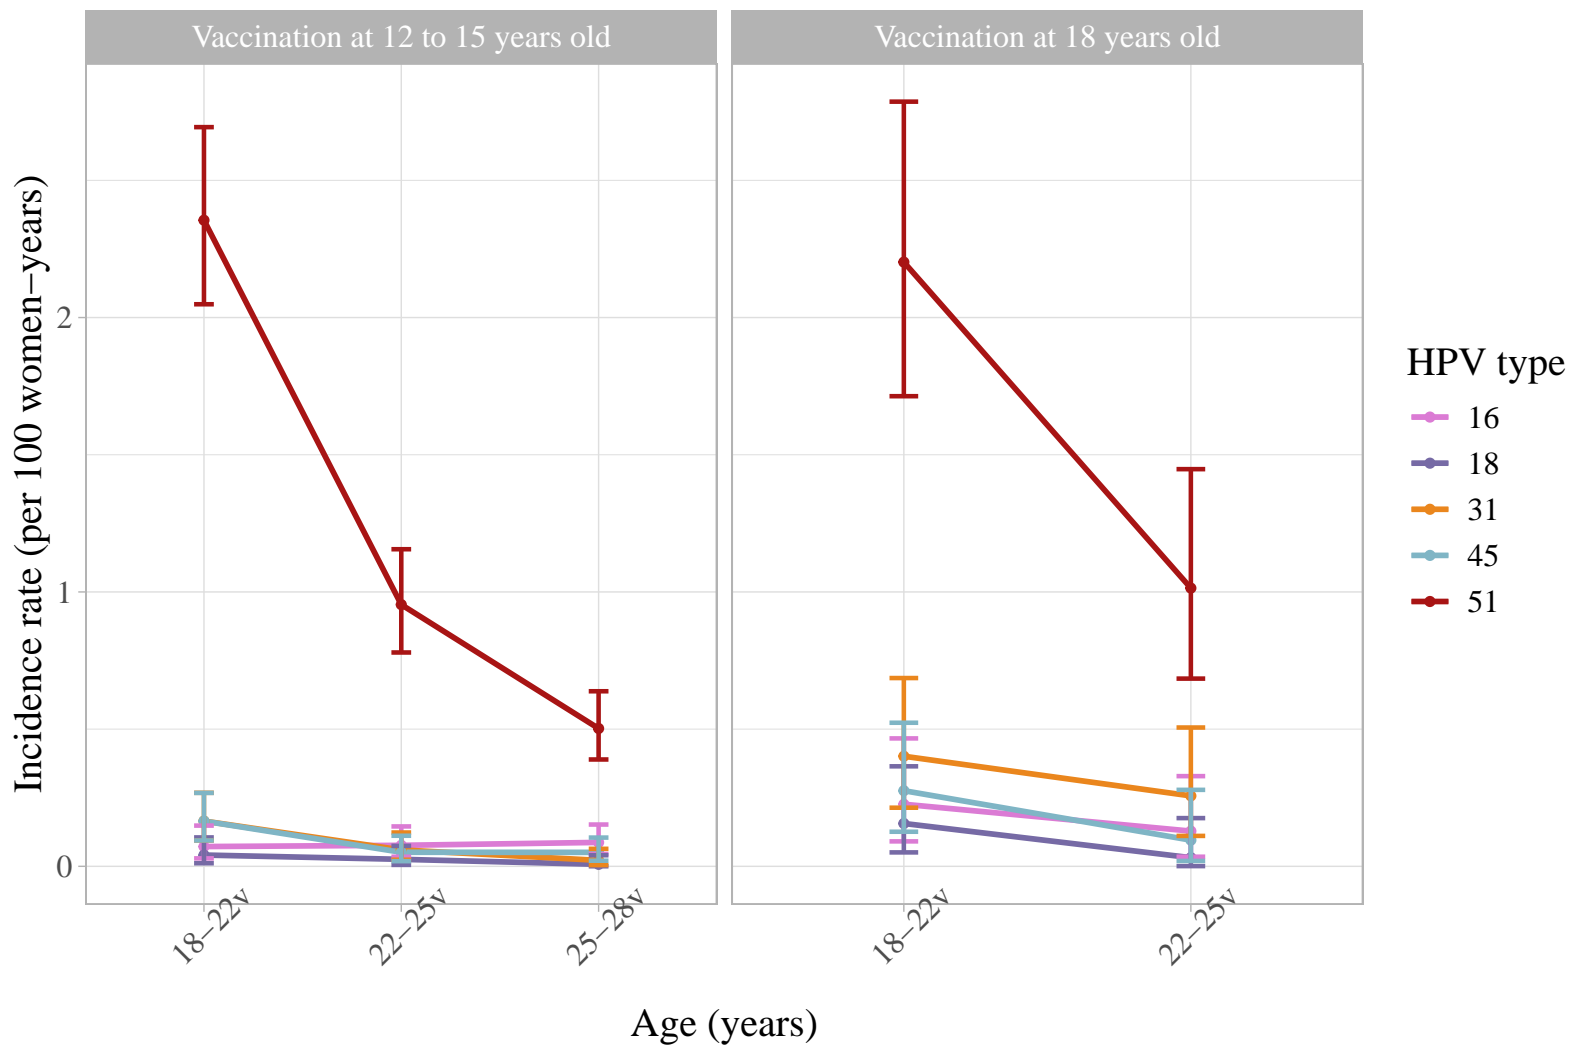

Supplement: Supplementary file 1 [file 2d27eaa688b4d8d5f06e7d58.pdf]

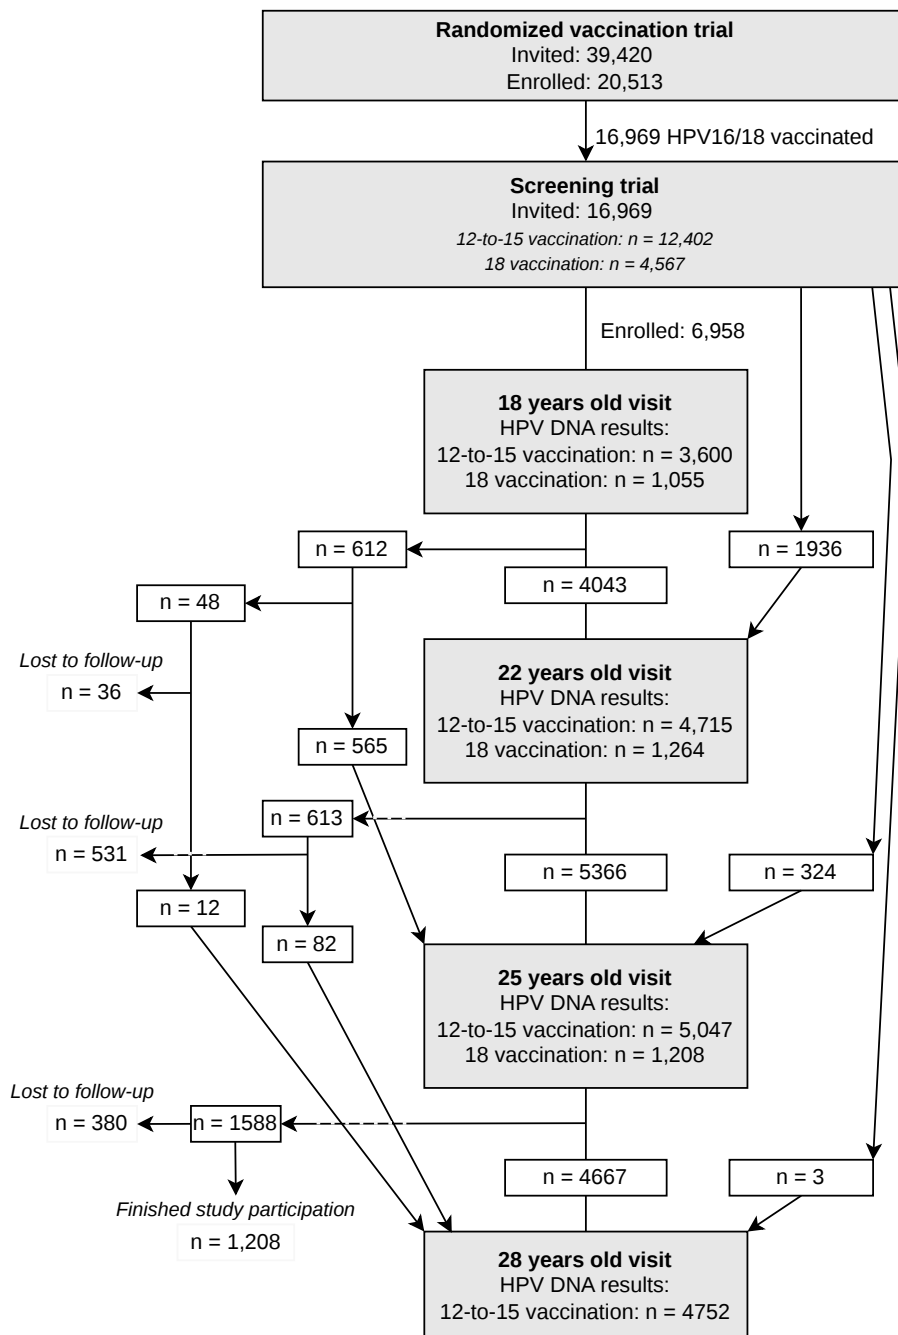

Supplement: Supplementary file 2 [file 46352987bd20891f5fc647d3.pdf]
